# Supplementary material
Source: MDPI journal article supplement (https://www.mdpi.com/2036-7481/14/1/29)
Supplement: s1 [file s1 › microbiolres-2251228-supplementary.pdf]

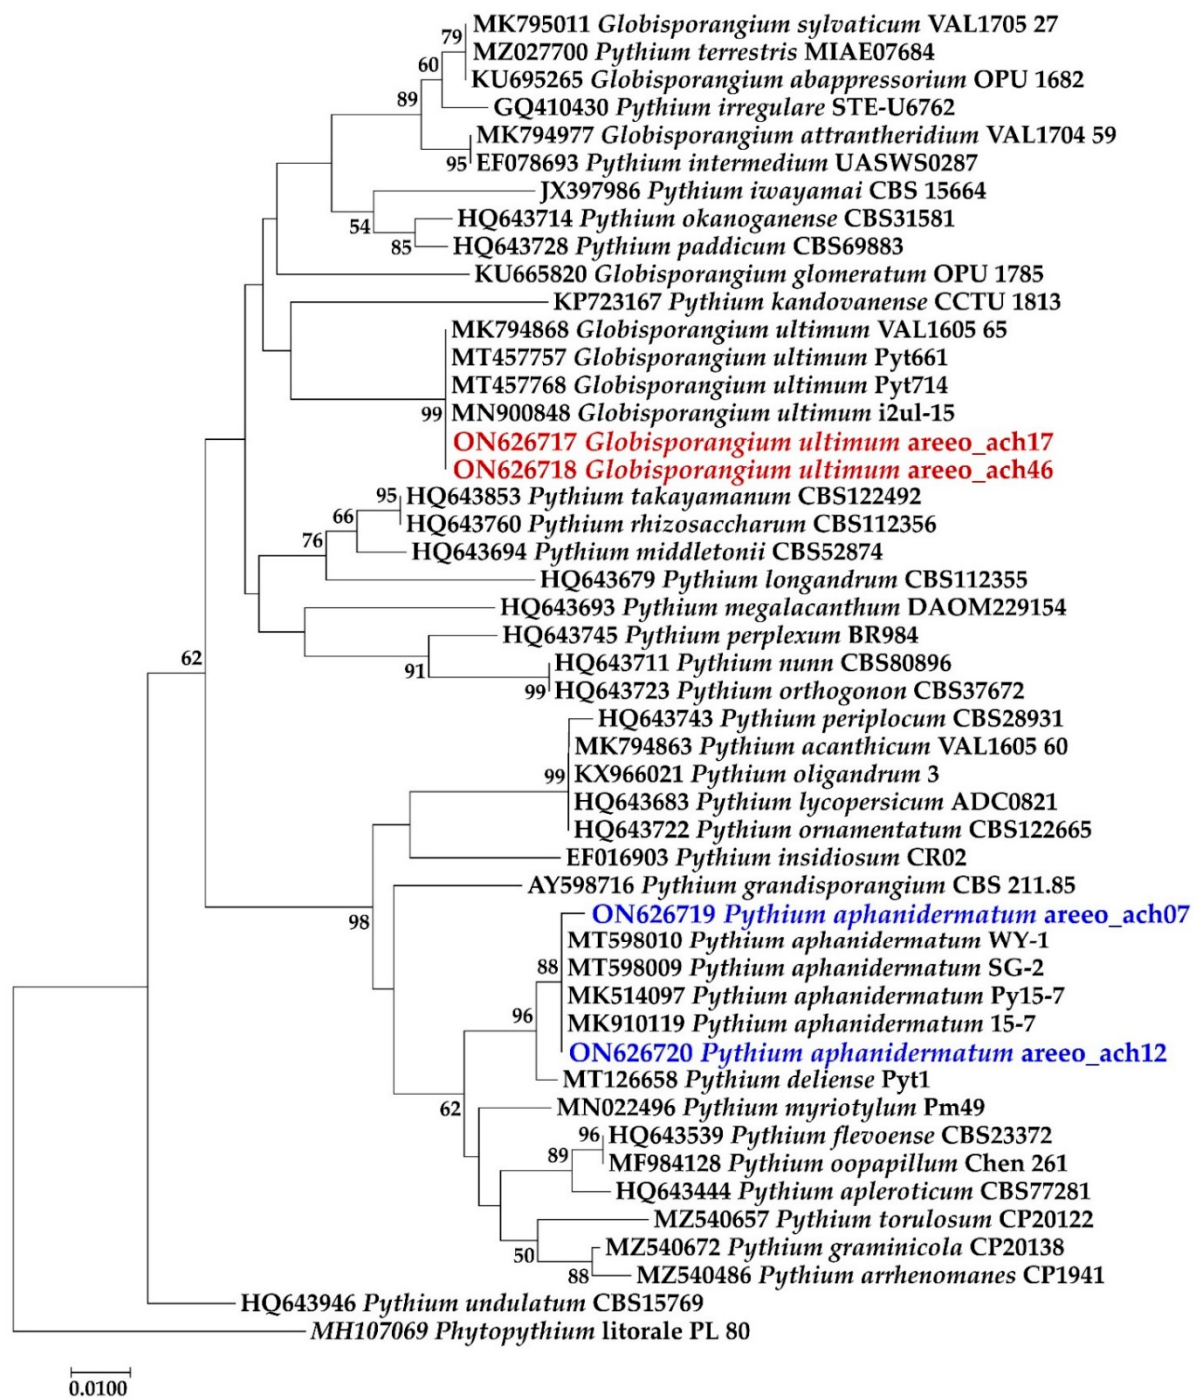

Figure S1. Phylogenetic positions of *Globisporangium ultimum* areeo\_ach17 and areeo\_ach46 isolates (GenBank accession numbers: ON626717, ON626718) and *Pythium aphanidermatum* areeo\_ach07 and areeo\_ach12 (GenBank accession numbers: ON626719, ON626720) among other oomycete spp. based on ITS-rDNA sequences neighbor-joining examination. Only bootstrap values higher than 50% are indicated on corresponding branches. MH107069 *Phytopythium litorale* PL 80 was used as outgroup taxon.
